# Supplementary material for: Gene expression profiling of upregulated mRNAs in granulosa cells of bovine ovulatory follicles following stimulation with hCG
Source: Springer Nature journal article supplement (doi:10.1186/s12958-017-0306-x), 2017-11-03
Supplement: MOESM1 [file 15190188]

## SUPPLEMENTARY FIGURE LEGENDS

1

### 2 **Supplementary FIG. 1.**

3 **Analyses of the cDNA subtraction efficiency.** PCR analysis was performed on the indicated  
4 samples using *PTGS2* or *CYP19A1* specific primers, as described under Materials and Methods.  
5 PCR product aliquots were collected at increasing numbers of PCR cycles as indicated. The  
6 *PTGS2* DNA fragment (418 bp) was detected following 13 PCR cycles in the OF-DF subtracted  
7 sample but not until 18 PCR cycles in the corresponding unsubtracted OF sample. The *CYP19A1*  
8 DNA fragment (520 bp) was detected following 13 PCR cycles in the DF-OF subtracted sample  
9 but not until 18 PCR cycles in the corresponding unsubtracted DF sample. *PTGS2* or *CYP19A1*  
10 were not detected in the DF or OF samples, respectively.

11

### 12 **Supplementary FIG. 2.**

13 **Representative differential screening results by macroarrays of the OF-DF cDNA library.**  
14 PCR-amplified cDNA fragments (OF-DF) obtained by SSH were dot-blotted to generate two  
15 identical sets of membranes. A total of 940 individual cDNAs were dot-blotted. The macroarrays  
16 were then hybridized with two different probe set: subtracted OF-DF cDNAs (**A**), and reverse-  
17 subtracted DF-OF cDNAs (**B**), as described under Materials and Methods. The two upper left-  
18 hand dots for each membrane served as internal hybridization controls: A1 = *CYP19A1* (negative  
19 control) and A2 = *PTGS2* (positive control) for the OF-DF reaction. The cDNA clones that were  
20 found to be differentially expressed in the OF-DF membrane following comparison of  
21 hybridization signals among the corresponding spots of the two membranes were further  
22 characterized by sequencing.

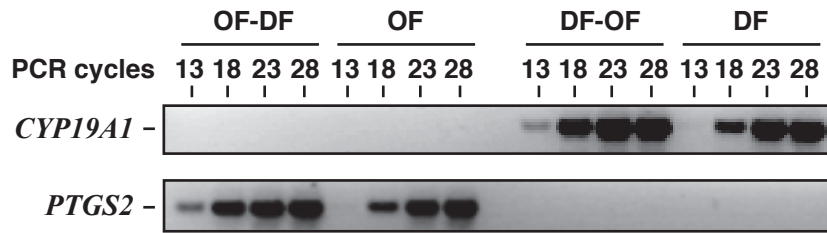

Supplementary Figure 1

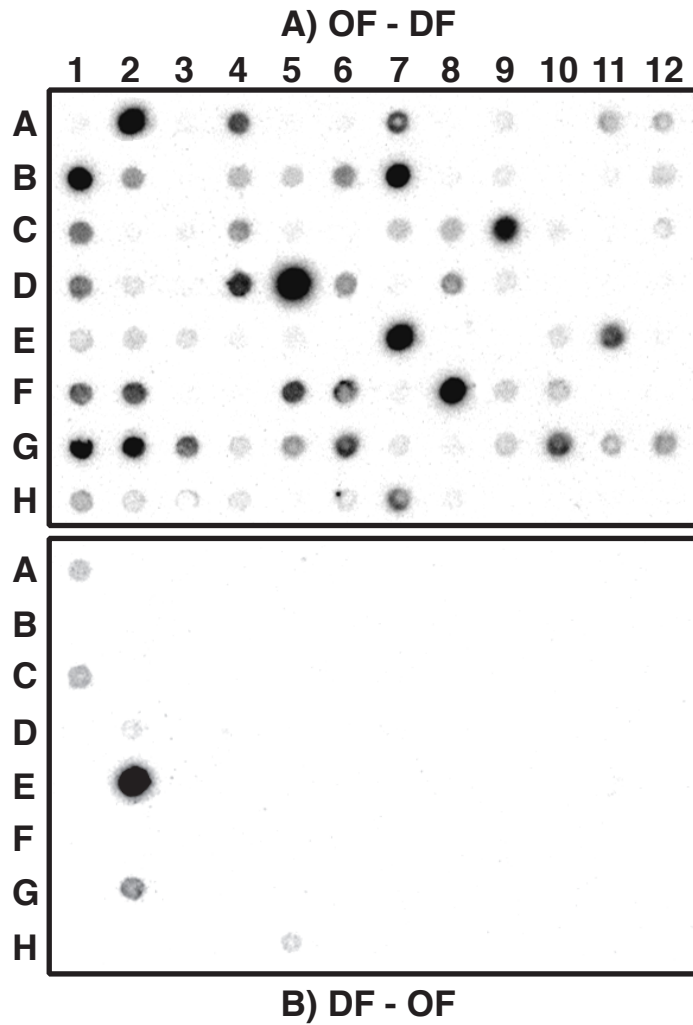

Supplementary Figure 2
